# Supplementary material for: Elevated 17β-Estradiol Protects Females from Influenza A Virus Pathogenesis by Suppressing Inflammatory Responses
Source: PLoS Pathog. 2011 Jul 28;7(7):e1002149. doi: 10.1371/journal.ppat.1002149 (PMC3145801; doi:10.1371/journal.ppat.1002149)
Supplement: Table S2 — Fold induction of cytokines and chemokines in the lungs of males that were gonadally intact, gonadectomized, or gonadectomized with testosterone replaced. (DOC) [file ppat.1002149.s002.doc]

**Supporting Information**

**Table S2.** **Fold induction of cytokines and chemokines in lung homogenates from males that were gonadally intact (sham), gonadectomized (gdx), or gdx with testosterone (T) replaced.**

|  |  | **Days Post-Inoculation** | | | |
| --- | --- | --- | --- | --- | --- |
| **Cytokine** | **Treatment** | 1 | 3 | 5 | 7 |
| CCL2 | Sham | 10.61±9.55 a | 64.40±17.54 a | 73.70±18.07 b | 64.69±17.14 a |
|  | Gdx | 1.12±0.90 a | 20.06±7.32 a | 23.40±6.01 b | 30.46±4.19 b |
|  | Gdx + T | 0.83±0.19 a | 34.75±5.05 a, b | 72.62±23.28 b,c | 95.95±16.65 c,d |
| CCL3 | Sham | 0.84±0.14 a | 5.67±0.85 a | 11.27±2.81 a | 33.29±7.18 b |
|  | Gdx | 0.76±0.27 a | 3.08±0.55 a | 8.92±1.25 a | 41.52±4.32 b |
|  | Gdx + T | 1.13±0.23 a | 6.75±0.5 a | 23.19±8.07 b | 73.57±9.60* c |
| IFN-γ | Sham | 3.86±2.77 a | 24.19±6.55 a | 624.41±606.90 a | 3468.93±887.89 b |
|  | Gdx | 0.45±0.27 a | 9.23±2.19 a | 8.42±2.14 a | 828.26±157.16* a |
|  | Gdx + T | 1.06±0.2 a | 33.95±8.85 a | 29.75±7.39 a | 1773.98±589.72* b |
| IL-1β | Sham | 0.91±0.15 a | 1.62±0.19 b | 1.62±0.23 b | 1.16±0.11 a |
|  | Gdx | 1.00±0.12 a | 1.90±0.23 b | 2.21±0.12 b | 1.70±0.13 b |
|  | Gdx + T | 1.00±0.15 a | 1.82±0.22 a | 2.25±0.42 b | 1.50±0.11 a |
| IL-6 | Sham | 16.35±15.62 a | 198.60±36.53 a | 351.96±117.34 a | 213.97±111.77 a |
|  | Gdx | 0.77±0.70 a | 19.01±7.69 a | 29.87±8.09 b | 11.16±2.06 a |
|  | Gdx + T | 1.07±0.27 a | 123.35±24.96 a | 381.96±162.65 b | 146.72±34.64 a |
| IL-10 | Sham | 0.35±0.15 a | 0.23±0.09 a | 0.87±0.39 a | 9.77±3.62 a |
|  | Gdx | 0.70±0.04 a | 0.77±0.06 a | 0.73±0.08 a | 72.52±17.12* b |
|  | Gdx + T | 1.50±0.53 a | 2.12±1.06 a | 2.12±1.16 a | 57.43±15.73* b |
| IL-12(p70) | Sham | 0.83±0.23 a | 1.15±0.43 a | 1.64±0.43 a | 2.21±0.60 a |
|  | Gdx | 1.18±0.37 a | 1.47±0.50 a | 1.56±0.60 a | 1.69±0.47 a |
|  | Gdx + T | 1.29±0.23 a | 2.18±0.49 a | 2.05±0.53 a | 3.61±1.38 a |
| TGF-β1 | Sham | 0.81±0.12 a | 0.84±0.17 a | 1.17±0.26 a | 1.13±0.24 a |
|  | Gdx | 0.59±0.10 a | 0.53±0.05 a | 0.81±0.14 a | 0.70±0.13 a |
|  | Gdx + T | 0.95±0.15 a | 1.10±0.17 a | 0.85±0.15 a | 1.62±0.31 a |
| TNF-α | Sham | 1.46±0.67 a | 8.03±1.10 a | 13.26±1.94 b | 17.49±4.56 b |
|  | Gdx | 0.88±0.32 a | 5.51±0.39 b | 10.16±1.41 c | 14.31±1.17 d |
|  | Gdx + T | 1.11±0.23 a | 13.10±2.75 a,b | 19.60±4.59 b,c | 30.00±4.81 c,d |

Data are represented as the mean ± SEM. Data were analyzed with 2-way ANOVAs followed by Bonferroni t-tests, with significant differences compared with sham males at an individual time-point represented by an asterisk (*) and significant differences within a treatment group, across time-points p.i. represented by different letters, *P* <0.05.
