# Supplementary material for: Elevated 17β-Estradiol Protects Females from Influenza A Virus Pathogenesis by Suppressing Inflammatory Responses
Source: PLoS Pathog. 2011 Jul 28;7(7):e1002149. doi: 10.1371/journal.ppat.1002149 (PMC3145801; doi:10.1371/journal.ppat.1002149)
Supplement: Table S4 — Fold induction of cytokines and chemokines in the lungs of females that were gonadectomized and assigned to receive vehicle, estradiol, an ERα agonist, or an ERβ agonist. (DOC) [file ppat.1002149.s004.doc]

**Supporting Information**

**Table S4.** **Fold induction of cytokines and chemokines in lung homogenates from females that were gonadectomized (gdx) and assigned to receive vehicle, estradiol (E2), an ER agonist (PPT), or an ER agonist (DPN).**

|  | **Treatment** | | | |
| --- | --- | --- | --- | --- |
| **Cytokine** | Gdx+Vehicle | Gdx + E2 | Gdx + ER Agonist | Gdx + ER Agonist |
| IFN-γ | 3738.71±880.88 | 2057.50±86.99 | 1859.03±199.42 | 2356.71±281.15 |
| IL-6 | 979.14±134.86 | 864.76±139.70 | 390.28±72.70*† | 674.62±120.69 |
| IL-10 | 189.73±20.72 | 311.54±26.77* | 206.74±24.40† | 90.34±11.37*† |
| IL12(p70) | 4.29±.097 | 4.82±.43 | 4.55±.052 | 5.43±.57 |

Data are represented as the mean ± SEM. Data were analyzed with 1-way ANOVAs followed by Bonferroni t-tests with significant differences compared with vehicle-treated females represented by an asterisk (*) and significant differences compared with E2-treated females represented by a dagger (†) *P* <0.05.
